# Supplementary material
Source: PubMed Central journal article supplement (PMC6299189)
Supplement: Appendix_1_Search_Strategy.pdf [file Appendix_1_Search_Strategy.pdf]

Search

Journals

Books

Multimedia

My Workspace

Mobile

Search History saved as "EPS Management MEDLINE"

Search History (31)

[View Saved](#)

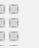

| <input type="checkbox"/> | # ▲ | Searches                                                                                                 | Results | Type     | Actions                                                  | Annotations |
|--------------------------|-----|----------------------------------------------------------------------------------------------------------|---------|----------|----------------------------------------------------------|-------------|
| <input type="checkbox"/> | 1   | exp Akathisia, Drug-Induced/dt [Drug Therapy]                                                            | 179     | Advanced | <a href="#">Display Results</a>   <a href="#">More ▼</a> |             |
| <input type="checkbox"/> | 2   | exp Dyskinesia, Drug-Induced/dt, et [Drug Therapy, Etiology]                                             | 3923    | Advanced | <a href="#">Display Results</a>   <a href="#">More ▼</a> |             |
| <input type="checkbox"/> | 3   | exp Psychomotor Agitation/dt [Drug Therapy]                                                              | 1603    | Advanced | <a href="#">Display Results</a>   <a href="#">More ▼</a> |             |
| <input type="checkbox"/> | 4   | exp Dyskinesias/dt [Drug Therapy]                                                                        | 10951   | Advanced | <a href="#">Display Results</a>   <a href="#">More ▼</a> |             |
| <input type="checkbox"/> | 5   | exp Parkinson Disease, Secondary/ci, dt [Chemically Induced, Drug Therapy]                               | 3756    | Advanced | <a href="#">Display Results</a>   <a href="#">More ▼</a> |             |
| <input type="checkbox"/> | 6   | exp Anti-Dyskinesia Agents/tu [Therapeutic Use]                                                          | 23226   | Advanced | <a href="#">Display Results</a>   <a href="#">More ▼</a> |             |
| <input type="checkbox"/> | 7   | 1 or 2 or 3 or 4 or 5 or 6                                                                               | 37236   | Advanced | <a href="#">Display Results</a>   <a href="#">More ▼</a> |             |
| <input type="checkbox"/> | 8   | limit 7 to (humans and "therapy (best balance of sensitivity and specificity)")                          | 4526    | Advanced | <a href="#">Display Results</a>   <a href="#">More ▼</a> |             |
| <input type="checkbox"/> | 9   | exp Antipsychotic Agents/ae [Adverse Effects]                                                            | 24501   | Advanced | <a href="#">Display Results</a>   <a href="#">More ▼</a> |             |
| <input type="checkbox"/> | 10  | exp GABA Agonists/tu [Therapeutic Use]                                                                   | 1784    | Advanced | <a href="#">Display Results</a>   <a href="#">More ▼</a> |             |
| <input type="checkbox"/> | 11  | exp Amantadine/tu [Therapeutic Use]                                                                      | 3235    | Advanced | <a href="#">Display Results</a>   <a href="#">More ▼</a> |             |
| <input type="checkbox"/> | 12  | exp Vitamin E/tu [Therapeutic Use]                                                                       | 5878    | Advanced | <a href="#">Display Results</a>   <a href="#">More ▼</a> |             |
| <input type="checkbox"/> | 13  | exp Cholinergic Antagonists/tu [Therapeutic Use]                                                         | 13914   | Advanced | <a href="#">Display Results</a>   <a href="#">More ▼</a> |             |
| <input type="checkbox"/> | 14  | exp GABA Modulators/tu [Therapeutic Use]                                                                 | 14868   | Advanced | <a href="#">Display Results</a>   <a href="#">More ▼</a> |             |
| <input type="checkbox"/> | 15  | exp Cholinergic Agents/tu [Therapeutic Use]                                                              | 32168   | Advanced | <a href="#">Display Results</a>   <a href="#">More ▼</a> |             |
| <input type="checkbox"/> | 16  | exp Adrenergic beta-Antagonists/tu [Therapeutic Use]                                                     | 34696   | Advanced | <a href="#">Display Results</a>   <a href="#">More ▼</a> |             |
| <input type="checkbox"/> | 17  | exp Levodopa/tu [Therapeutic Use]                                                                        | 7108    | Advanced | <a href="#">Display Results</a>   <a href="#">More ▼</a> |             |
| <input type="checkbox"/> | 18  | exp Botulinum Toxins/tu [Therapeutic Use]                                                                | 6303    | Advanced | <a href="#">Display Results</a>   <a href="#">More ▼</a> |             |
| <input type="checkbox"/> | 19  | exp Diphenhydramine/tu [Therapeutic Use]                                                                 | 1170    | Advanced | <a href="#">Display Results</a>   <a href="#">More ▼</a> |             |
| <input type="checkbox"/> | 20  | exp Baclofen/tu [Therapeutic Use]                                                                        | 1299    | Advanced | <a href="#">Display Results</a>   <a href="#">More ▼</a> |             |
| <input type="checkbox"/> | 21  | exp Tetrabenazine/tu [Therapeutic Use]                                                                   | 215     | Advanced | <a href="#">Display Results</a>   <a href="#">More ▼</a> |             |
| <input type="checkbox"/> | 22  | exp Piracetam/tu [Therapeutic Use]                                                                       | 1683    | Advanced | <a href="#">Display Results</a>   <a href="#">More ▼</a> |             |
| <input type="checkbox"/> | 23  | exp Clozapine/tu [Therapeutic Use]                                                                       | 3742    | Advanced | <a href="#">Display Results</a>   <a href="#">More ▼</a> |             |
| <input type="checkbox"/> | 24  | exp Benzodiazepines/tu [Therapeutic Use]                                                                 | 17626   | Advanced | <a href="#">Display Results</a>   <a href="#">More ▼</a> |             |
| <input type="checkbox"/> | 25  | exp Calcium Channel Blockers/tu [Therapeutic Use]                                                        | 26311   | Advanced | <a href="#">Display Results</a>   <a href="#">More ▼</a> |             |
| <input type="checkbox"/> | 26  | exp Deep Brain Stimulation/ut [Utilization]                                                              | 22      | Advanced | <a href="#">Display Results</a>   <a href="#">More ▼</a> |             |
| <input type="checkbox"/> | 27  | exp Vitamins/tu [Therapeutic Use]                                                                        | 54038   | Advanced | <a href="#">Display Results</a>   <a href="#">More ▼</a> |             |
| <input type="checkbox"/> | 28  | 10 or 11 or 12 or 13 or 14 or 15 or 16 or 17 or 18 or 19 or 20 or 21 or 22 or 23 or 24 or 25 or 26 or 27 | 176831  | Advanced | <a href="#">Display Results</a>   <a href="#">More ▼</a> |             |
| <input type="checkbox"/> | 29  | 9 and 28                                                                                                 | 3939    | Advanced | <a href="#">Display Results</a>   <a href="#">More ▼</a> |             |
| <input type="checkbox"/> | 30  | limit 29 to (humans and "therapy (best balance of sensitivity and specificity)")                         | 800     | Advanced | <a href="#">Display Results</a>   <a href="#">More ▼</a> |             |
| <input type="checkbox"/> | 31  | 8 or 30                                                                                                  | 5051    | Advanced | <a href="#">Display Results</a>   <a href="#">More ▼</a> |             |

[Contract](#)

Save Remove Combine with:

▼ **Search History** (29)

[View Saved](#)

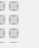

| <input type="checkbox"/> | # ▲ | Searches                                                                                                | Results | Type     | Actions                                                  | Annotations |
|--------------------------|-----|---------------------------------------------------------------------------------------------------------|---------|----------|----------------------------------------------------------|-------------|
| <input type="checkbox"/> | 1   | exp Akathisia, Drug-Induced/dt [Drug Therapy]                                                           | 2       | Advanced | <a href="#">Display Results</a>   <a href="#">More ▼</a> |             |
| <input type="checkbox"/> | 2   | exp Dyskinesia, Drug-Induced/dt, et [Drug Therapy, Etiology]                                            | 23      | Advanced | <a href="#">Display Results</a>   <a href="#">More ▼</a> |             |
| <input type="checkbox"/> | 3   | exp Psychomotor Agitation/dt [Drug Therapy]                                                             | 19      | Advanced | <a href="#">Display Results</a>   <a href="#">More ▼</a> |             |
| <input type="checkbox"/> | 4   | exp Dyskinesias/dt [Drug Therapy]                                                                       | 336     | Advanced | <a href="#">Display Results</a>   <a href="#">More ▼</a> |             |
| <input type="checkbox"/> | 5   | exp Parkinson Disease, Secondary/ci, dt [Chemically Induced, Drug Therapy]                              | 109     | Advanced | <a href="#">Display Results</a>   <a href="#">More ▼</a> |             |
| <input type="checkbox"/> | 6   | exp Anti-Dyskinesia Agents/tu [Therapeutic Use]                                                         | 1066    | Advanced | <a href="#">Display Results</a>   <a href="#">More ▼</a> |             |
| <input type="checkbox"/> | 7   | 1 or 2 or 3 or 4 or 5 or 6                                                                              | 1435    | Advanced | <a href="#">Display Results</a>   <a href="#">More ▼</a> |             |
| <input type="checkbox"/> | 8   | exp Antipsychotic Agents/ae [Adverse Effects]                                                           | 730     | Advanced | <a href="#">Display Results</a>   <a href="#">More ▼</a> |             |
| <input type="checkbox"/> | 9   | exp GABA Agonists/tu [Therapeutic Use]                                                                  | 73      | Advanced | <a href="#">Display Results</a>   <a href="#">More ▼</a> |             |
| <input type="checkbox"/> | 10  | exp Amantadine/tu [Therapeutic Use]                                                                     | 350     | Advanced | <a href="#">Display Results</a>   <a href="#">More ▼</a> |             |
| <input type="checkbox"/> | 11  | exp Vitamin E/tu [Therapeutic Use]                                                                      | 125     | Advanced | <a href="#">Display Results</a>   <a href="#">More ▼</a> |             |
| <input type="checkbox"/> | 12  | exp Cholinergic Antagonists/tu [Therapeutic Use]                                                        | 520     | Advanced | <a href="#">Display Results</a>   <a href="#">More ▼</a> |             |
| <input type="checkbox"/> | 13  | exp GABA Modulators/tu [Therapeutic Use]                                                                | 392     | Advanced | <a href="#">Display Results</a>   <a href="#">More ▼</a> |             |
| <input type="checkbox"/> | 14  | exp Cholinergic Agents/tu [Therapeutic Use]                                                             | 908     | Advanced | <a href="#">Display Results</a>   <a href="#">More ▼</a> |             |
| <input type="checkbox"/> | 15  | exp Adrenergic beta-Antagonists/tu [Therapeutic Use]                                                    | 1002    | Advanced | <a href="#">Display Results</a>   <a href="#">More ▼</a> |             |
| <input type="checkbox"/> | 16  | exp Levodopa/tu [Therapeutic Use]                                                                       | 67      | Advanced | <a href="#">Display Results</a>   <a href="#">More ▼</a> |             |
| <input type="checkbox"/> | 17  | exp Botulinum Toxins/tu [Therapeutic Use]                                                               | 201     | Advanced | <a href="#">Display Results</a>   <a href="#">More ▼</a> |             |
| <input type="checkbox"/> | 18  | exp Diphenhydramine/tu [Therapeutic Use]                                                                | 70      | Advanced | <a href="#">Display Results</a>   <a href="#">More ▼</a> |             |
| <input type="checkbox"/> | 19  | exp Baclofen/tu [Therapeutic Use]                                                                       | 16      | Advanced | <a href="#">Display Results</a>   <a href="#">More ▼</a> |             |
| <input type="checkbox"/> | 20  | exp Tetrabenazine/tu [Therapeutic Use]                                                                  | 19      | Advanced | <a href="#">Display Results</a>   <a href="#">More ▼</a> |             |
| <input type="checkbox"/> | 21  | exp Piracetam/tu [Therapeutic Use]                                                                      | 215     | Advanced | <a href="#">Display Results</a>   <a href="#">More ▼</a> |             |
| <input type="checkbox"/> | 22  | exp Clozapine/tu [Therapeutic Use]                                                                      | 293     | Advanced | <a href="#">Display Results</a>   <a href="#">More ▼</a> |             |
| <input type="checkbox"/> | 23  | exp Benzodiazepines/tu [Therapeutic Use]                                                                | 392     | Advanced | <a href="#">Display Results</a>   <a href="#">More ▼</a> |             |
| <input type="checkbox"/> | 24  | exp Calcium Channel Blockers/tu [Therapeutic Use]                                                       | 971     | Advanced | <a href="#">Display Results</a>   <a href="#">More ▼</a> |             |
| <input type="checkbox"/> | 25  | exp Deep Brain Stimulation/ut [Utilization]                                                             | 0       | Advanced | <a href="#">Save</a>   <a href="#">More ▼</a>            |             |
| <input type="checkbox"/> | 26  | exp Vitamins/tu [Therapeutic Use]                                                                       | 1447    | Advanced | <a href="#">Display Results</a>   <a href="#">More ▼</a> |             |
| <input type="checkbox"/> | 27  | 9 or 10 or 11 or 12 or 13 or 14 or 15 or 16 or 17 or 18 or 19 or 20 or 21 or 22 or 23 or 24 or 25 or 26 | 5877    | Advanced | <a href="#">Display Results</a>   <a href="#">More ▼</a> |             |
| <input type="checkbox"/> | 28  | 8 and 27                                                                                                | 144     | Advanced | <a href="#">Display Results</a>   <a href="#">More ▼</a> |             |
| <input type="checkbox"/> | 29  | 7 or 28                                                                                                 | 1550    | Advanced | <a href="#">Display Results</a>   <a href="#">More ▼</a> |             |

[Contract](#)

[Save](#) [Remove](#) Combine with: [AND](#) [OR](#)

[Save All](#) [Edit](#) [Create RSS](#) [View Saved](#)
